# Supplementary material
Source: PubMed Central journal article supplement (PMC5585028)
Supplement: NIHMS847565-supplement-supplement_1.pdf [file NIHMS847565-supplement-supplement_1.pdf]

# Supporting Material for: Low Rank Alternating Direction Method of Multipliers Reconstruction for MR Fingerprinting

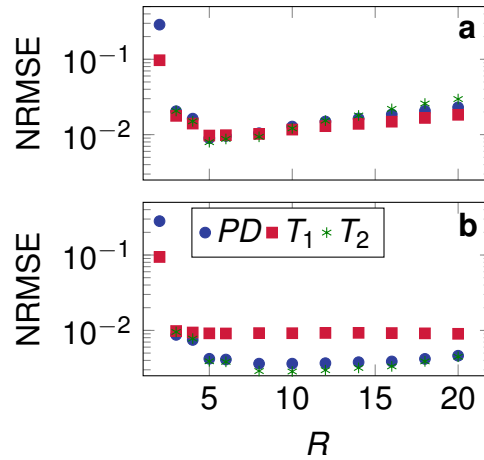

Supporting Figure 1: The normalized root mean square error (NRMSE) was calculated for the low rank ADMM algorithm when using 1 radial spoke (a) and 4 spokes per  $TR$  (b), respectively. Note that the NRMSE of  $T_1$  is bound by the discretization of the dictionary in (b).

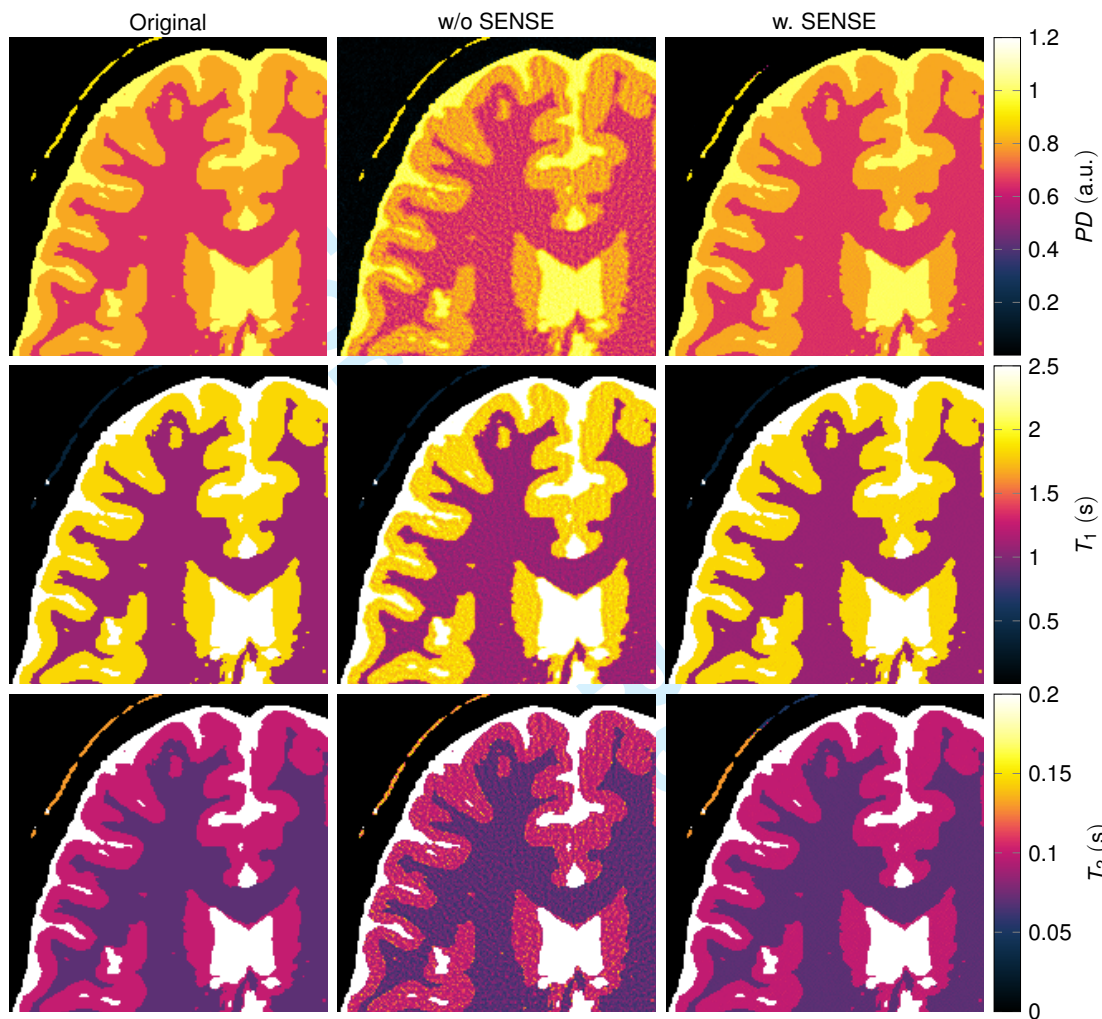

Supporting Figure 2: The effect of parallel imaging is demonstrated at the example of a simulated data set with a matrix size of  $384 \times 384$ . A total of 841 radial spokes and in vivo coil sensitivity profiles of a 44 channel head coil (reduced to 12 virtual coils) were used.
